# Supplementary material
Source: MDPI journal article supplement (https://www.mdpi.com/2073-4441/15/2/289)
Supplement: s1 [file s1 › water-2118681-supplementary.pdf]

| Stratigraphic unit | Stratigraphic Log                                                                  | Stratigraphic Description                 | Litho-Stratigraphic Unit   | Hydrogeological Unit                   |                  |
|--------------------|------------------------------------------------------------------------------------|-------------------------------------------|----------------------------|----------------------------------------|------------------|
| Quaternary         | 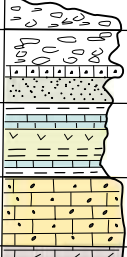  | Alluvium                                  | Continental                | Water Table                            | Terminal Complex |
| Mio-Pliocene       |                                                                                    | Gypsum<br>Limestone Pudding<br>Sand, Clay | Terminal                   | Sand Table                             |                  |
| Middle Eocene      |                                                                                    | Clay, Gypsum<br>Dolomite Limestone        | Clay Evaporitic Eocene     | Semi-impermeable middle Eocene Aquifer |                  |
| Lower Eocene       |                                                                                    | White Flint Limestone                     | Carbonate Eocene           | Table Water of Limestone               |                  |
| Upper Senonian     |                                                                                    | Dolomitic Limestone                       | Senonian Carbonate         |                                        |                  |
| Lower Senonian     | 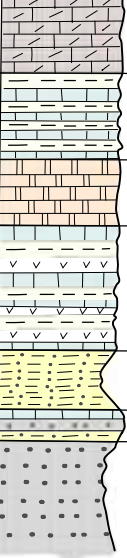 | Alternation of Limestone and Marl         | Senonian Lagoon            | Impermeable                            |                  |
| Turonian           |                                                                                    | Dolomitic Limestone                       | Carbonate Turonian         | Turonian Limestone Table               |                  |
| Cenomanian         |                                                                                    | Marl-Limestone<br>Marls<br>Gypsum         | Clay-Evaporitic Cenomanian | Impermeable                            |                  |
| Albian             |                                                                                    | Clays Sandstone                           | Albien Argillo Sandstone   | Continental Intercalaire Aquifer       |                  |
| Aptian             |                                                                                    | Limestone, Clay Marl, Sandstone           | Albian Sandstone Lagoon    |                                        |                  |
| Barremian          | Sandstone                                                                          | Barremien Sandstone                       |                            |                                        |                  |

**Figure S1.** Summary of the geological units of the Biskra region.
